# Supplementary material
Source: Springer Nature journal article supplement (https://www.springermedizin.de/resource/supplementary/12998_2012_69_MOESM1_ESM.pdf/9680064)
Supplement: MOESM1 [file 9680064]

Baseline: 529 patients

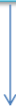

1 Week Data: 407 patients.  
122 missed calls

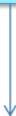

1 Month Data: 419 patients.  
51 missed calls. 59 not yet time to phone.

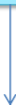

3 Month Data: 383 patients.  
21 missed calls. 126 not yet time to phone.

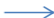

4 patients: 3  
consecutive  
missed calls.  
Baseline data  
not included.
